# Supplementary material for: A hierarchical 2D Ni–Mo–S nanosheet@nitrogen doped graphene hybrid as a Pt-free cathode for high-performance dye sensitized solar cells and fuel cells
Source: Royal Society of Chemistry journal article supplement (doi:10.1039/c7ta04807f), 2017-01-01
Supplement: c7ta04807f1.pdf [file c7ta04807f1.pdf]

## Supporting Information

### **Hierarchical 2D Ni-Mo-S nanosheets@nitrogen doped graphene hybrid as Pt-free cathode for high-performance dye sensitized solar cells and fuel cells**

Jayaraman Balamurugan,<sup>a</sup> Shaik Gouse Peera,<sup>a</sup> Meng Guo,<sup>a</sup> Thanh Tuan Nguyen,<sup>a</sup> Nam Hoon Kim,<sup>a</sup> Joong Hee Lee<sup>a,b\*</sup>

<sup>a</sup>Advanced Materials Institute of BIN Convergence Technology (BK21 Plus Global) & Dept. of BIN Convergence Technology, Chonbuk National University, Jeonju, Jeonbuk, 54896,

Republic of Korea

<sup>b</sup>Carbon Composite Research Centre, Department of Polymer - Nano Science and Technology, Chonbuk National University, Jeonju, Jeonbuk, 54896, Republic of Korea

---

*\*Corresponding author:* Tel: +82-63-270-2342

Email address: [jhl@jbnu.ac.kr](mailto:jhl@jbnu.ac.kr) (Joong Hee Lee)

---

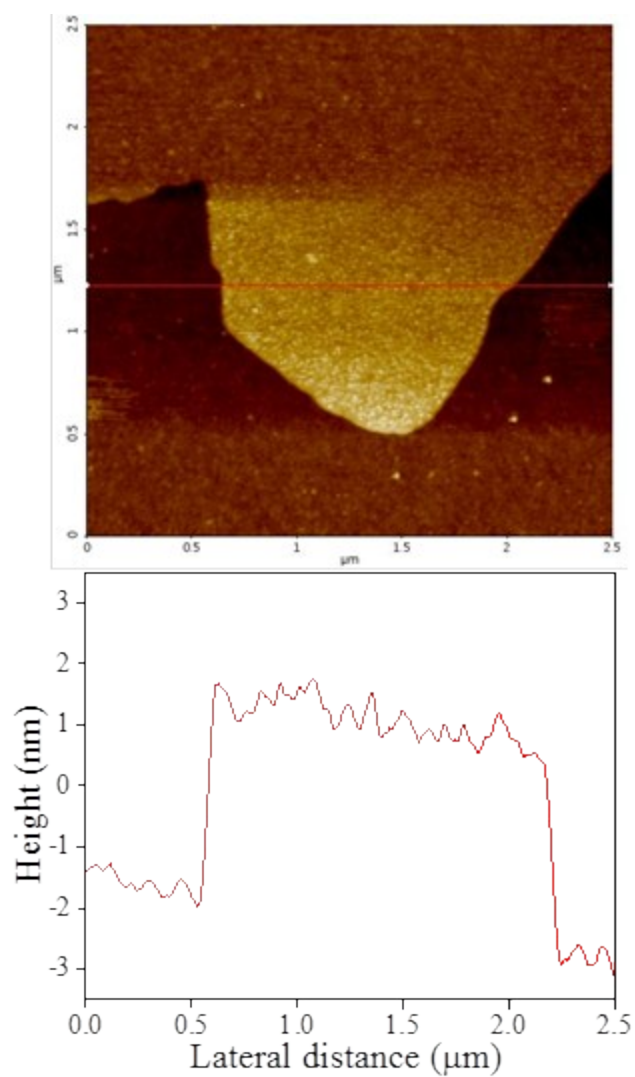

**Fig. S1** AFM image and its height profile of Ni-Mo-S/NG hybrid indicating thickness of few nm and width  $\sim 2.5 \mu\text{m}$ .

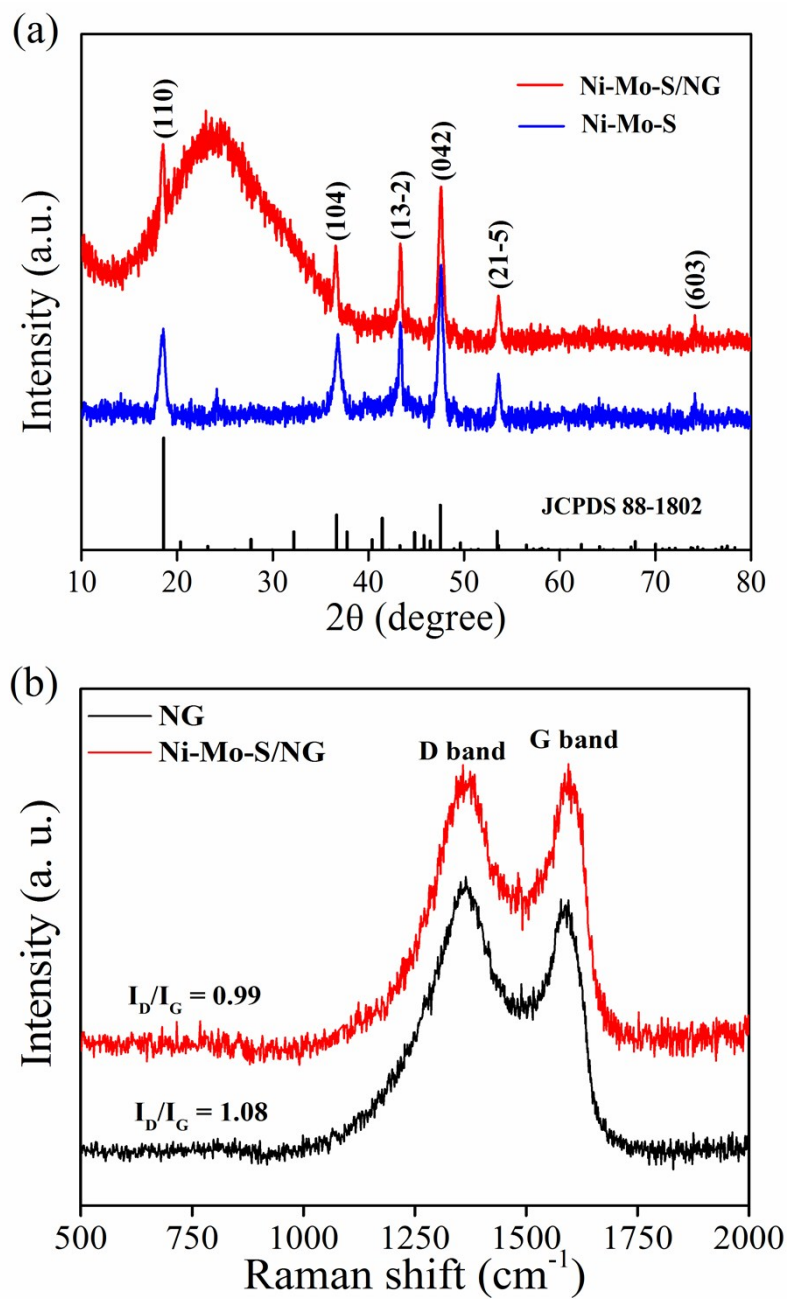

**Fig. S2** (a) XRD pattern of as-synthesized Ni-Mo-S nanosheet and Ni-Mo-S/NG hybrid, and (b) Raman spectra of as-synthesized NG and Ni-Mo-S/NG hybrid.

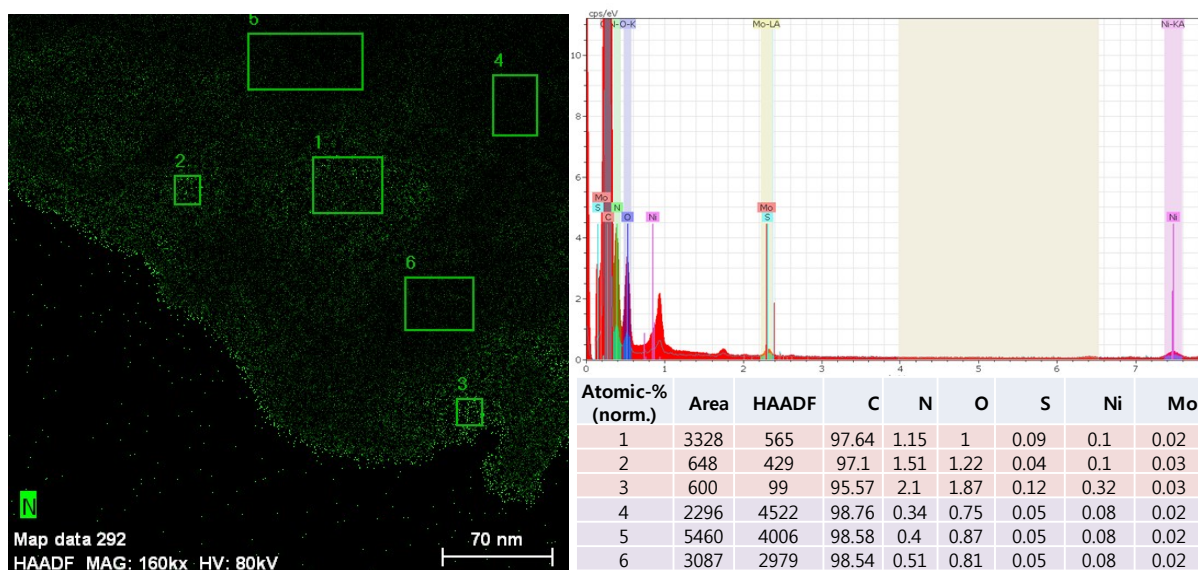

**Fig. S3** EDS quantification MAP data (K-factor) and its corresponding atomic wt. % of the Ni-Mo-S/NG hybrid.

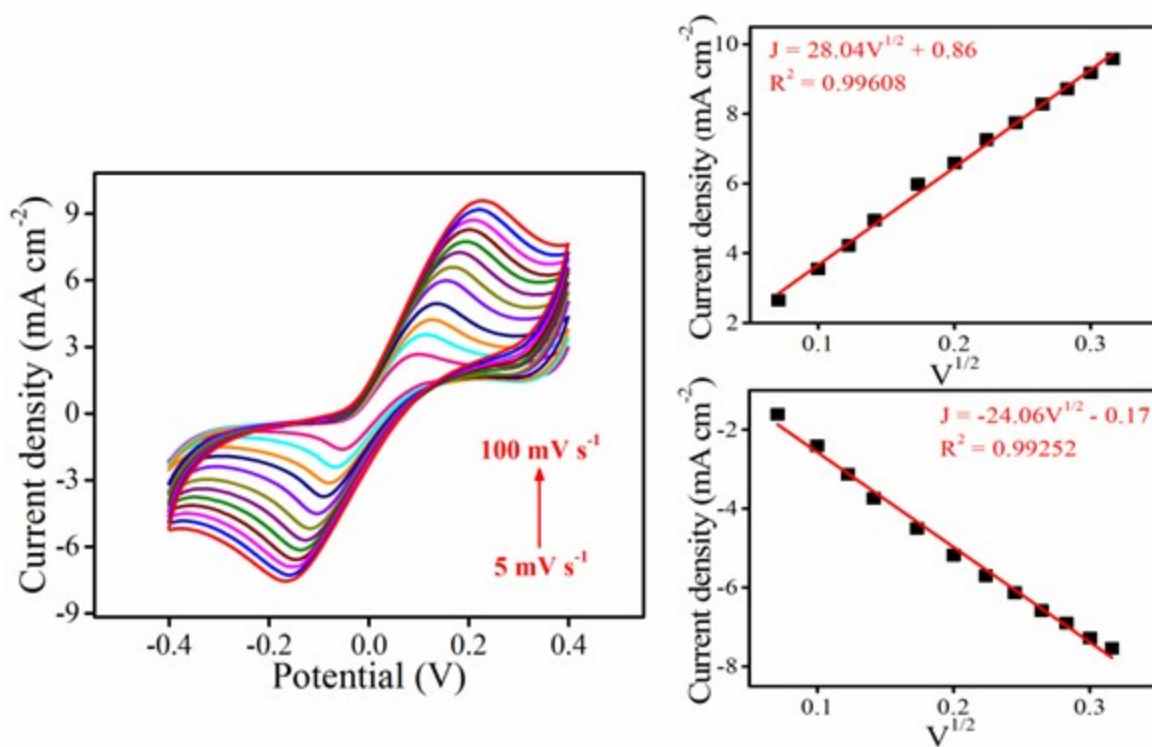

**Fig. S4** (a) CV curves of the Ni-Mo-S/NG CE with different sweep rates, and b) the relationship of square root of scan rate vs redox peak current.

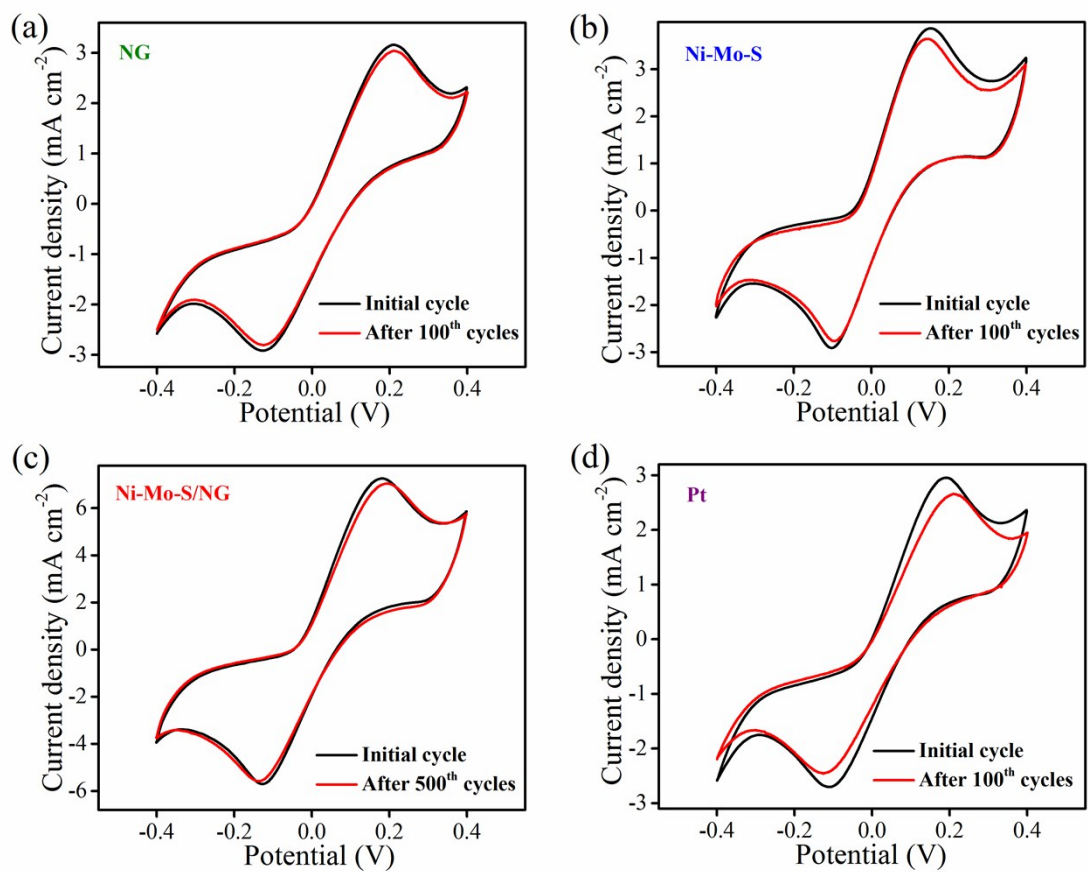

**Fig. S5** Electrochemical stability of the NG, pure Ni-Mo-S, Ni-Mo-S/NG and Pt was investigated by successive CV scanning towards  $I^-/I_3^-$  reduction reaction (scan rate:  $50 \text{ mV s}^{-1}$ ).

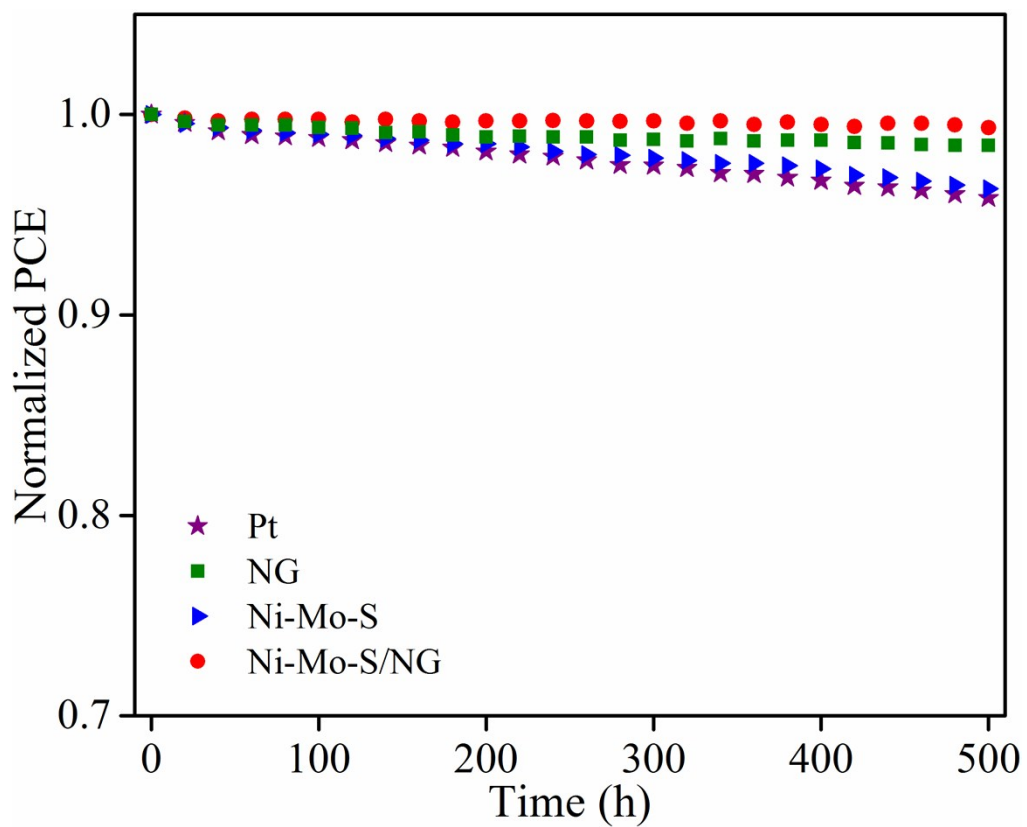

**Fig. S6** Long-term stability test for DSSCs based on NG, pure Ni-Mo-S, Ni-Mo-S/NG and Pt CEs.

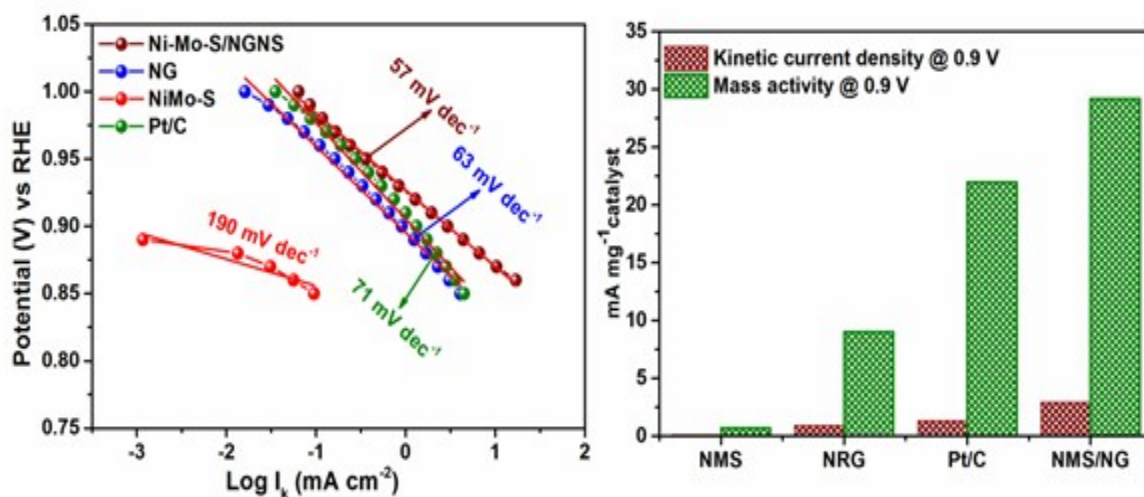

**Fig. S7** (a) tafel plots (b) kinetic current density and mass activity of Ni-Mo-S, NG, Pt/C and Ni-Mo-S/NG catalysts measured at a mass transport corrected potential of 0.9 V vs RHE. (c) Initial and 2000<sup>th</sup> CVs Pt/C catalyst recorded in N<sub>2</sub> saturated 0.1 M KOH at a scan rate of 50 mV S<sup>-1</sup> (d) LSVs of Pt/C catalyst recorded in O<sub>2</sub> saturated 0.1 M KOH at a scan rate of 10 mV S<sup>-1</sup> with an electrode rotation speed of 1600 rpm.



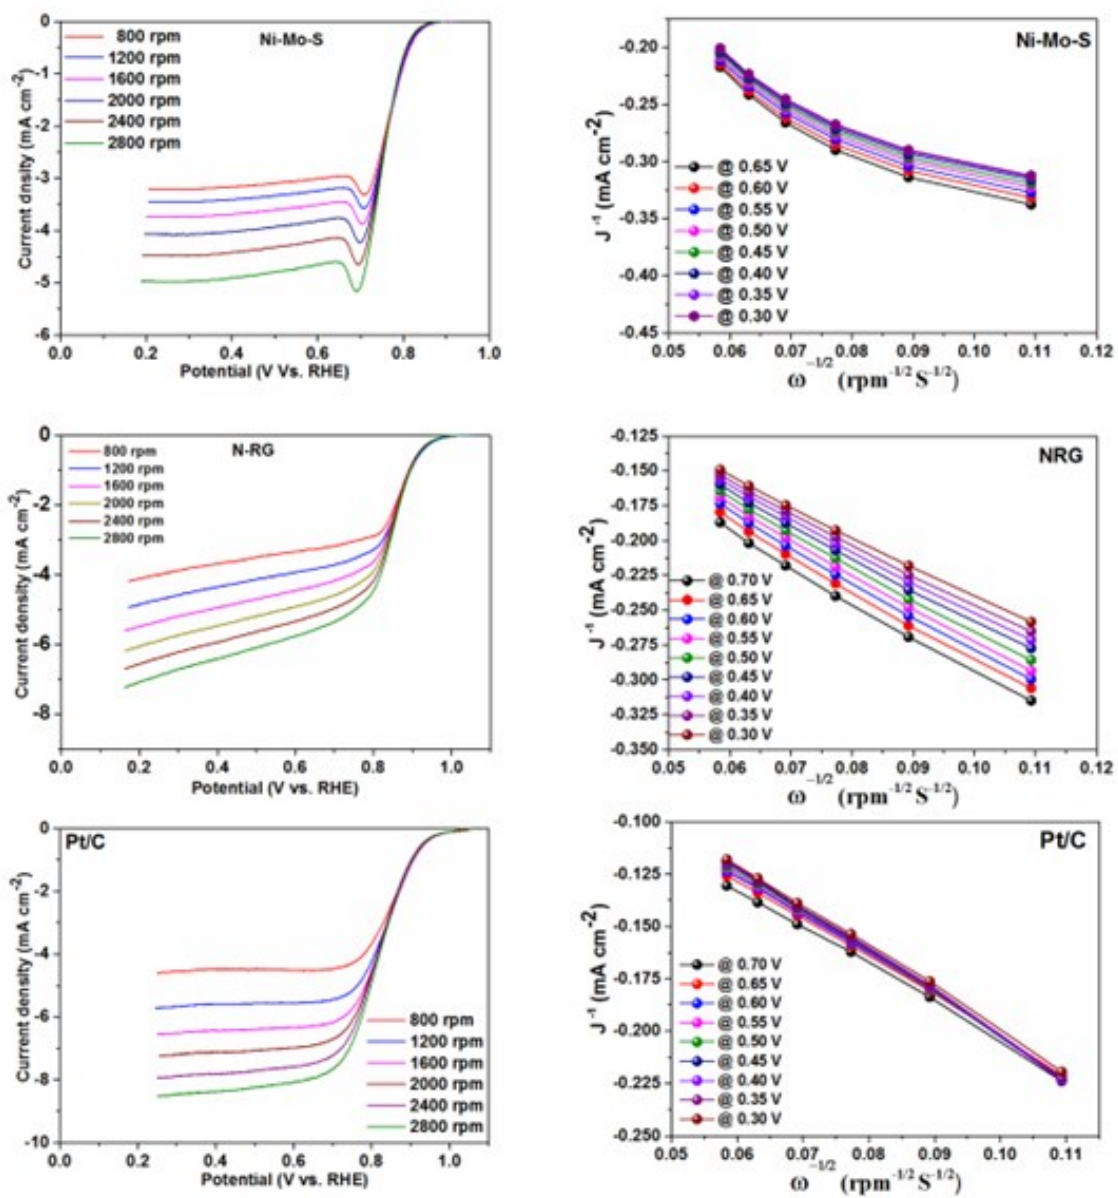

**Fig. S8** LSV recorded at different rotation speeds and corresponding K-L plots of the catalyst (a), (c), (e), and (b), (d) and (f) of Ni-Mo-S, NG and Pt/C catalysts.

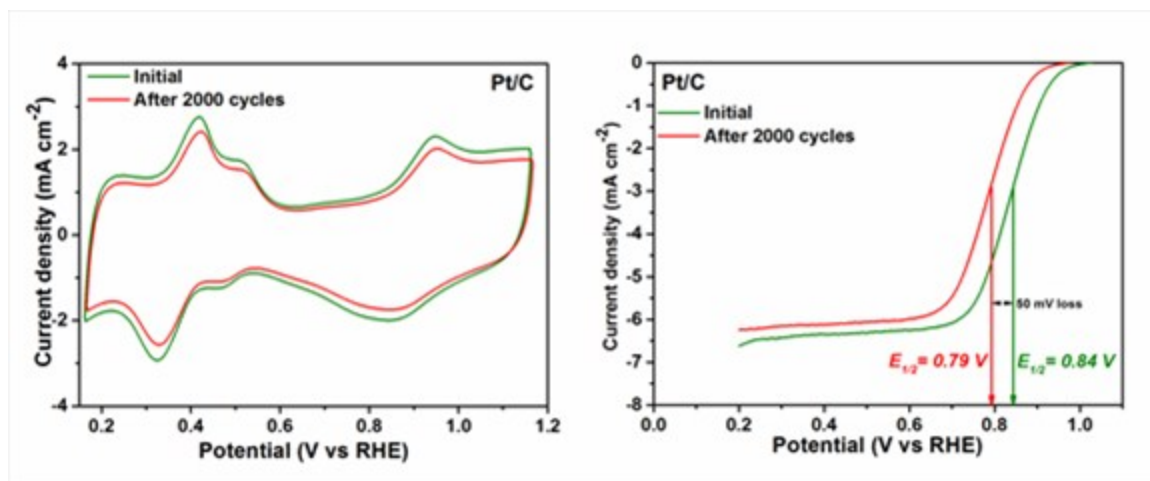

**Fig. S9** (a) Initial and 2000<sup>th</sup> CVs Pt/C catalyst recorded in N<sub>2</sub> saturated 0.1 M KOH at a scan rate of 50 mV S<sup>-1</sup> (b) LSVs of Pt/C catalyst recorded in O<sub>2</sub> saturated 0.1 M KOH at a scan rate of 10 mV S<sup>-1</sup> with the electrode rotation speed of 1600 rpm.

**Table S1.** Elemental composition of as-synthesized NG, pure Ni-Mo-S, and Ni-Mo-S/NG estimated from ICP-AES measurements.

| Sample     | Ni (at. %) | Mo (at. %) | S (at. %) | N (at. %) | O (at. %) | C (at. %) |
|------------|------------|------------|-----------|-----------|-----------|-----------|
| NG         | -          | -          | -         | 9.87      | 7.15      | 82.98     |
| Ni-Mo-S    | 28.89      | 27.95      | 32.45     | -         | 10.71     | -         |
| Ni-Mo-S/NG | 3.62       | 3.54       | 9.06      | 10.24     | 6.29      | 67.25     |

**Table S2.** Photovoltaic parameters of DSSCs with different CEs under 100 mW cm<sup>-2</sup> illuminations.

| Counter electrode                    | J <sub>sc</sub> (mA cm <sup>-2</sup> ) | V <sub>oc</sub> (V) | FF   | η (%) | References |
|--------------------------------------|----------------------------------------|---------------------|------|-------|------------|
| CoNi <sub>2</sub> S <sub>4</sub> -CF | 15.30                                  | 0.68                | 0.67 | 7.03  | 1          |
| FeS <sub>2</sub>                     | 15.14                                  | 0.71                | 0.68 | 7.31  | 2          |
| Co <sub>9</sub> S <sub>8</sub> /FTO  | 14.21                                  | 0.71                | 0.69 | 7.00  | 3          |
| Ni <sub>0.85</sub> Se                | 16.67                                  | 0.74                | 0.64 | 7.85  | 4          |
| CuInS-ZnS                            | 15.3                                   | 0.77                | 0.64 | 7.50  | 5          |
| Co <sub>0.85</sub> Se                | 16.98                                  | 0.74                | 0.75 | 9.40  | 6          |
| Ni <sub>0.85</sub> Se                | 15.63                                  | 0.74                | 0.72 | 8.32  | 6          |
| CuZnSnSSe                            | 17.70                                  | 0.80                | 0.52 | 7.37  | 7          |
| CoS                                  | 14.70                                  | 0.78                | 0.71 | 8.10  | 8          |
| NiS <sub>2</sub> @RGO                | 16.55                                  | 0.75                | 0.69 | 8.55  | 9          |
| Cu <sub>2</sub> FeSnS <sub>4</sub>   | 14.57                                  | 0.75                | 0.73 | 8.03  | 10         |
| NiS                                  | 14.70                                  | 0.73                | 0.66 | 6.81  | 11         |
| NiS/graphene                         | 10.31                                  | 0.72                | 0.70 | 5.25  | 12         |
| Patterned MoS <sub>2</sub>           | 15.2                                   | 0.73                | 0.52 | 5.80  | 13         |
| MoS <sub>2</sub> -C                  | 15.07                                  | 0.75                | 0.68 | 7.69  | 14         |
| NHGF                                 | 11.33                                  | 0.75                | 0.66 | 5.56  | 15         |
| NGC                                  | 16.23                                  | 0.77                | 0.54 | 6.74  | 16         |
| L-GQDs                               | 15.21                                  | 0.76                | 0.72 | 7.70  | 17         |
| MoS <sub>2</sub> /RGO-CNT            | 14.59                                  | 0.76                | 0.67 | 7.46  | 18         |

|                       |       |      |      |      |           |
|-----------------------|-------|------|------|------|-----------|
| MoS <sub>2</sub> -GNS | 12.79 | 0.77 | 0.59 | 5.81 | 19        |
| MoS <sub>2</sub> /RGO | 12.51 | 0.73 | 0.66 | 6.04 | 20        |
| G-MoS <sub>2</sub>    | 16.1  | 0.66 | 0.67 | 7.10 | 21        |
| N-GNRs                | 15.18 | 0.78 | 0.72 | 8.57 | 22        |
| N-MEG                 | 15.04 | 0.73 | 0.65 | 7.18 | 23        |
| CN <sub>x</sub> /CNT  | 16.30 | 0.73 | 0.61 | 7.38 | 24        |
| GNR/CNT               | 16.73 | 0.73 | 0.67 | 8.23 | 25        |
| Pt                    | 14.54 | 0.77 | 0.78 | 8.73 | This work |
| Ni-Mo-S/NG            | 15.65 | 0.79 | 0.80 | 9.89 | This work |

NHGF – nitrogen doped holey reduced graphene; NGC – N-doped graphene-CNT; L-GQDs – laser-reduced graphene quantum dots; G-MoS<sub>2</sub> – Graphene-mediated highly-dispersed MoS<sub>2</sub>; GNR – graphene nanoribbon; N-GNRs – nitrogen doped graphene nanoribbon; N-MEG – nitrogen-doped microwave-exfoliated graphene

## Notes and References

- 1 L. Chen, Y. Zhou, H. Daia, T. Yu, J. Liu and Z. Zou, *Nano Energy*, 2015, **11**, 697–703.
- 2 Y. C. Wang, D. Y. Wang, Y. T. Jiang, H. A. Chen, C. C. Chen, K. C. Ho, H. L. Chou and C. W. Chen, *Angew. Chem. Int. Ed.*, 2013, **52**, 6694–6698.
- 3 S. H. Chang, M. D. Lu, Y. L. Tung and H. Y. Tuan, *ACS Nano*, 2013, **7**, 9443–9451.
- 4 Y. Duan, Q. Tang, J. Liu, B. He and L. Yu, *Angew. Chem. Int. Ed.*, 2014, **53**, 14569–14574.
- 5 L. Yi, Y. Liu, N. Yang, Z. Tang, H. Zhao, G. Ma, Z. Su and D. Wang, *Energy Environ. Sci.*, 2013, **6**, 835–840.
- 6 F. Gong, H. Wang, X. Xu, G. Zhou and Z. S. Wang, *J. Am. Chem. Soc.*, 2012, **134**, 10953–10958.
- 7 X. Xin, M. He, W. Han, J. Jung and Z. Lin, *Angew. Chem. Int. Ed.*, 2011, **50**, 11739–11742.

- 8 S. H. Hsu, C. T. Li, H. T. Chien, R. R. Salunkhe, N. Suzuki, Y. Yamauchi, K. C. Ho, K. C. W. Wu, *Sci. Rep.*, 2014, **4**, 6983.
- 9 J. Hu, J. Zheng, L. Tian, Y. Duan, L. Lin, S. Cui, H. Peng, T. Liu, H. Guo, X. Wang, F. Pan, *Chem. Comm.*, 2015, **51**, 7855–7858.
- 10 R. R. Prabhakar, N. H. Loc, M. H. Kumar, P. P. Boix, S. Juan, R. A. John, S. K. Batabyal and L. H. Wong, *ACS Appl. Mater. Interfaces*, 2014, **6**, 17661–17667.
- 11 J. Yang, C. Bao, K. Zhu, T. Yu, F. Li, J. Liu, Z. Li and Z. Zou, *Chem. Commun.*, 2014, **50**, 4824–4826.
- 12 H. Bi, W. Zhao, S. Sun, H. Cui, T. Lin, F. Huang, X. Xie and M. Jiang, *Carbon*, 2013, **61**, 116–123.
- 13 J. Zhang, S. Najmaei, H. Lin and J. Lou, *Nanoscale*, 2014, **6**, 5279–5283.
- 14 G. Yue, J. Wu, Y. Xiao, M. Huang, J. Lin and J. Y. Lin, *J. Mater. Chem. A*, 2013, **1**, 1495–1501.
- 15 M. Yu, J. Zhang, S. Li, Y. Meng and J. Liu, *J. Power Sources*, 2016, **308**, 44–51.
- 16 J. Ma, C. Li, F. Yu and J. Chen, *J. Power Sources*, 2015, **273**, 1048–1055.
- 17 Q. Chang, L. Huang, J. Wang, Z. Ma, P. Li, Y. Yan, J. Zhu, S. Xu, L. Shen, Q. Chen, Q. Yu and W. Shi, *Carbon*, 2015, **85**, 185–193.
- 18 J. Y. Lin, A. L. Su, C. Y. Chang, K. C. Hung and T. W. Lin, *ChemElectroChem*, 2015, **2**, 720–725.
- 19 J. Y. Lin, C. Y. Chan and S. W. Chou, *Chem. Commun.*, 2013, **49**, 1440–1442.
- 20 C. J. Liu, S. Y. Tai, S. W. Chou, Y. C. Yu, K. D. Chang, S. Wang, F. S. S. Chien, J. Y. Lin and T. W. Lin, *J. Mater. Chem.*, 2012, **22**, 21057–21064.

- 21 C. Yu, X. Meng, X. Song, S. Liang, Q. Dong, G. Wang, Ce Hao, X. Yang, T. Ma, P. M. Ajayan and J. Qiu, *Carbon*, 2016, **100**, 474–483.
- 22 X. Meng, C. Yu, X. Song, Y. Liu, S. Liang, Z. Liu, C. Hao and J. Qiu, *Adv. Energy Mater.*, 2015, **5**, 1500180.
- 23 P. Zhai, T. C. Wei, Y. H. Chang, Y. T. Huang, W. T. Yeh, H. Su and S. P. Feng, *Small*, 2014, **10**, 3347–3353.
- 24 A. Shrestha, M. Batmunkh, C. J. Shearer, Y. Yin, G. G. Andersson, J. G. Shapter, S. Qiao and S. Dai, *Adv. Energy Mater.*, 2017, **7**, 1602276.
- 25 Z. Yang, M. Liu, C. Zhang, W. W. Tjiu, T. Liu, and H. Peng, *Angew. Chem., Int. Ed.*, 2013, **52**, 3996–3999.
